# Supplementary material for: Iron Status and Risk of Stroke: A Mendelian Randomization Study
Source: PubMed Central journal article supplement (PMC6257507; doi:10.1161/strokeaha.118.022701), 2018-10-25
Supplement: str-49-2815-s001.pdf [file str-49-2815-s001.pdf]

## **SUPPLEMENTAL MATERIAL**

Supplemental Tables: I-II

Supplemental Figures and Figure Legends: I-V

Supplemental References

MEGASTROKE Authors

## Supplemental Table

Supplemental Table I. Genetic association estimates for SNPs associated with biomarkers of iron status at genome-wide significance in the Genetics of Iron Status Consortium's GWAS meta-analysis.<sup>1</sup>

| SNP         | Corresponding gene   | Effect allele | Effect allele frequency | Iron (μmol/l) |                |                  | Log10 Ferritin (μg/l) |                |                 | Transferrin saturation (%) |                |                  | Transferrin (g/l) |                |                  |
|-------------|----------------------|---------------|-------------------------|---------------|----------------|------------------|-----------------------|----------------|-----------------|----------------------------|----------------|------------------|-------------------|----------------|------------------|
|             |                      |               |                         | Estimate      | Standard error | p value          | Estimate              | Standard error | p value         | Estimate                   | Standard error | p value          | Estimate          | Standard error | p value          |
| rs744653    | <i>WDR75-SLC40A1</i> | T             | 0.85                    | 0.00          | 0.01           | 0.70             | <b>-0.09</b>          | <b>0.01</b>    | <b>8.37E-19</b> | -0.03                      | 0.01           | 0.01             | <b>0.07</b>       | <b>0.01</b>    | <b>1.35E-11</b>  |
| rs8177240   | <i>TF</i>            | T             | 0.67                    | <b>-0.07</b>  | <b>0.01</b>    | <b>6.65E-20</b>  | 0.02                  | 0.01           | 3.90E-03        | <b>0.10</b>                | <b>0.01</b>    | <b>7.24E-38</b>  | <b>-0.38</b>      | <b>0.01</b>    | <b>8.43E-610</b> |
| rs9990333** | <i>TFRC</i>          | T             | 0.46                    | 0.02          | 0.01           | 0.01             | 0.00                  | 0.01           | 0.88            | 0.04                       | 0.01           | 7.28E-08         | <b>-0.05</b>      | <b>0.01</b>    | <b>1.95E-13</b>  |
| rs1800562*  | <i>HFE</i>           | A             | 0.07                    | <b>0.33</b>   | <b>0.02</b>    | <b>2.72E-97</b>  | <b>0.20</b>           | <b>0.02</b>    | <b>1.54E-38</b> | <b>0.58</b>                | <b>0.02</b>    | <b>2.19E-270</b> | <b>-0.48</b>      | <b>0.02</b>    | <b>8.90E-196</b> |
| rs1799945*  | <i>HFE</i>           | C             | 0.85                    | <b>-0.19</b>  | <b>0.01</b>    | <b>1.10E-81</b>  | <b>-0.07</b>          | <b>0.01</b>    | <b>1.71E-10</b> | <b>-0.23</b>               | <b>0.01</b>    | <b>5.13E-109</b> | <b>0.11</b>       | <b>0.01</b>    | <b>9.36E-30</b>  |
| rs7385804** | <i>TFR2</i>          | A             | 0.62                    | <b>0.06</b>   | <b>0.01</b>    | <b>1.36E-18</b>  | 0.02                  | 0.01           | 0.04            | <b>0.05</b>                | <b>0.01</b>    | <b>6.07E-12</b>  | 0.00              | 0.01           | 0.73             |
| rs4921915   | <i>NAT2</i>          | A             | 0.78                    | 0.00          | 0.01           | 0.63             | 0.00                  | 0.01           | 0.89            | -0.03                      | 0.01           | 3.60E-03         | <b>0.08</b>       | <b>0.01</b>    | <b>7.05E-19</b>  |
| rs651007    | <i>ABO</i>           | T             | 0.20                    | 0.00          | 0.01           | 0.61             | <b>-0.05</b>          | <b>0.01</b>    | <b>1.31E-08</b> | -0.01                      | 0.01           | 0.50             | 0.00              | 0.01           | 0.92             |
| rs6486121   | <i>ARNTL</i>         | T             | 0.63                    | -0.01         | 0.01           | 0.20             | 0.01                  | 0.01           | 0.42            | 0.02                       | 0.01           | 0.05             | <b>-0.05</b>      | <b>0.01</b>    | <b>3.89E-10</b>  |
| rs174577    | <i>FADS2</i>         | A             | 0.33                    | 0.00          | 0.01           | 0.88             | -0.01                 | 0.01           | 0.10            | -0.03                      | 0.01           | 1.60E-03         | <b>0.06</b>       | <b>0.01</b>    | <b>2.28E-17</b>  |
| rs411988**  | <i>TEX14</i>         | A             | 0.56                    | 0.00          | 0.01           | 0.77             | <b>-0.04</b>          | <b>0.01</b>    | <b>1.59E-10</b> | -0.01                      | 0.01           | 0.12             | 0.01              | 0.01           | 0.05             |
| rs855791*   | <i>TMPRSS6</i>       | A             | 0.45                    | <b>-0.18</b>  | <b>0.01</b>    | <b>1.32E-139</b> | <b>-0.06</b>          | <b>0.01</b>    | <b>1.38E-14</b> | <b>-0.19</b>               | <b>0.01</b>    | <b>6.41E-137</b> | <b>0.04</b>       | <b>0.01</b>    | <b>1.98E-09</b>  |

\*SNPs used in the main MR analyses.

\*\*SNPs additionally used in the MR sensitivity analyses.

| Supplemental Table II. Key findings of observational studies investigating the effect of iron status on stroke risk, separated by study design |                                                                                                                                                                                                                                                                                   |                                                                                     |                                                                                      |          |                                                                                                                                                                                                                                                                                                                                                                                                                                                           |
|------------------------------------------------------------------------------------------------------------------------------------------------|-----------------------------------------------------------------------------------------------------------------------------------------------------------------------------------------------------------------------------------------------------------------------------------|-------------------------------------------------------------------------------------|--------------------------------------------------------------------------------------|----------|-----------------------------------------------------------------------------------------------------------------------------------------------------------------------------------------------------------------------------------------------------------------------------------------------------------------------------------------------------------------------------------------------------------------------------------------------------------|
| Study                                                                                                                                          | Population                                                                                                                                                                                                                                                                        | Exposure                                                                            | Outcome                                                                              | Duration | Result                                                                                                                                                                                                                                                                                                                                                                                                                                                    |
| <i>Study design: case-control</i>                                                                                                              |                                                                                                                                                                                                                                                                                   |                                                                                     |                                                                                      |          |                                                                                                                                                                                                                                                                                                                                                                                                                                                           |
| Chang <i>et al</i> , 2013 <sup>2</sup>                                                                                                         | n=51,093 cases<br>n=153,279 controls (unmatched)<br>Country: Taiwan (Taiwanese Longitudinal Health Insurance Database 2000)<br>Age (mean ± SD):<br>Cases – 64.1±14.9 years<br>Controls – 64.0±15.0 years                                                                          | IDA diagnosis (pre-stroke)                                                          | Ischemic stroke, including thrombotic and embolic subtypes                           | -        | IDA OR cases ischemic stroke versus controls: 1.45 (95% CI: 1.34-1.58, p<0.001)*<br>IDA OR cases thrombotic stroke versus controls: 1.79 (95% CI: 1.44-2.24)<br>IDA OR cases embolic stroke versus controls: 1.90 (95% CI: 1.31-2.76)                                                                                                                                                                                                                     |
| Eklblom <i>et al</i> , 2007 <sup>3</sup>                                                                                                       | n=231 cases<br>n=550 controls (matched for age, geographical area and date of health survey completion)<br>Country: Sweden (MONICA cohort for cases, and MONICA and Västerbotten cohorts for controls)<br>Age (mean ± SD):<br>Cases – 55.0±8.4 years<br>Controls – 54.8±8.3 years | Ferritin (pre-stroke)<br>Transferrin saturation (pre-stroke)<br><i>HFE</i> genotype | Ischemic stroke, including atherothrombotic, small vessel and cardioembolic subtypes | -        | Ischemic stroke OR highest versus lowest quintile of:<br>Ferritin – 0.80 (95% CI: 0.46-1.40)<br>Transferrin saturation – 0.78 (95% CI: 0.46-1.32)<br>Atherothrombotic, small vessel (lacunar) and cardioembolic stroke ORs: no significant associations with iron status biomarkers (data not reported)<br>Ischemic stroke OR C282Y/C282Y versus wt/wt: 0.95 (95% CI: 0.09-10.55)<br>Ischemic stroke OR H63D/H63D versus wt/wt: 2.26 (95% CI: 0.49-10.42) |
| Hruskovicová <i>et al</i> , 2005 <sup>4</sup>                                                                                                  | n=96 cases<br>n=115 controls (unmatched)<br>Country: Slovenia (Caucasians)<br>Age (mean ± SD):<br>Cases – 62.3±10.2 years<br>Controls – 63.0±11.8 years                                                                                                                           | <i>HFE</i> genotype                                                                 | Atherothrombotic ischemic stroke                                                     | -        | Stroke OR C282Y/C282Y and C282Y/wt versus wt/wt: 1.1 (95% CI: 0.4-3.0, p=0.93)<br>Stroke OR H63D/H63D and H63D/wt: 1.1 (95% CI: 0.6-2.1, p=0.75)                                                                                                                                                                                                                                                                                                          |

|                                                   |                                                                                                                                                                                               |                                                                 |                           |           |                                                                                                                                                                                                                                                                                                                                                                                                          |
|---------------------------------------------------|-----------------------------------------------------------------------------------------------------------------------------------------------------------------------------------------------|-----------------------------------------------------------------|---------------------------|-----------|----------------------------------------------------------------------------------------------------------------------------------------------------------------------------------------------------------------------------------------------------------------------------------------------------------------------------------------------------------------------------------------------------------|
| Njajou <i>et al</i> , 2002 <sup>5</sup>           | n=202 cases<br>n=2730 controls (unmatched)<br>Country: Netherlands (Rotterdam Study)<br>Age (mean ± SD) <sup>‡</sup> :<br>Cases – 69.3±6.5 years<br>Controls – 65.1±5.4 years                 | HFE genotype                                                    | Stroke                    | -         | Proportion of C282Y carriers and H63D carriers cases versus controls: 43.7% versus 37.6% (p=0.09)                                                                                                                                                                                                                                                                                                        |
| <i>Study design: case-cohort</i>                  |                                                                                                                                                                                               |                                                                 |                           |           |                                                                                                                                                                                                                                                                                                                                                                                                          |
| Quintana Pacheco <i>et al</i> , 2018 <sup>6</sup> | n=513 cases<br>n=2738 controls (unmatched)<br>Country: Germany (EPIC Heidelberg)<br>Age (median [interquartile range]:<br>Cases – 57.6 [51.6-61.8] years<br>Controls – 51.3 [43.7-57.8] years | Ferritin<br>Serum iron<br>Transferrin<br>Transferrin saturation | Stroke                    | 7.5 years | Stroke HR per doubling in:<br>Ferritin – 0.95 (95% CI: 0.86-1.04, p=0.22)<br>Serum iron – HR 1.17 (95% CI: 0.91-1.51, p=0.23)<br>Transferrin – HR 1.25 (95% CI: 0.69-2.25, p=0.46)<br>Transferrin saturation – 1.11 (95% CI: 0.88-1.41, p=0.37)                                                                                                                                                          |
| van der A <i>et al</i> , 2005 <sup>7</sup>        | n= 63 cases<br>n= 1134 controls (unmatched)<br>Country: Netherlands (Prospect-EPIC study)<br>Age: 49-79 years, post-menopausal females only                                                   | Ferritin<br>Serum iron<br>Transferrin                           | Stroke<br>Ischemic stroke | 4.3 years | Stroke HR highest versus lowest tertile of:<br>Ferritin – HR 1.45 (95% CI: 0.87-2.42)<br>Serum iron – HR 0.67 (95% CI: 0.42-1.07)<br>Transferrin saturation – HR 0.80 (95% CI: 0.50-1.30)<br>Ischemic stroke HR highest tertile versus lowest tertile of:<br>Ferritin – HR 2.23 (95% CI: 1.05-4.73)*<br>Serum iron – HR 0.84 (95% CI: 0.38-1.87)<br>Transferrin saturation – HR 1.09 (95% CI: 0.36-3.32) |
| <i>Study design: cohort</i>                       |                                                                                                                                                                                               |                                                                 |                           |           |                                                                                                                                                                                                                                                                                                                                                                                                          |
| Ellervik <i>et al</i> , 2007 <sup>8</sup>         | n=393 cases<br>n=9081 total cohort<br>Country: Denmark (The Copenhagen City Heart Study)                                                                                                      | HFE genotype                                                    | Ischemic stroke           | 24 years  | HR ischemic stroke H63D/H63D versus wt/wt: 2.8 (95% CI: 1.7-4.6)*<br>HR ischemic stroke C282Y/C282Y versus wt/wt: 1.5 (95% CI: 0.2-11.0)                                                                                                                                                                                                                                                                 |

|                                            |                                                                                                                                  |                                      |                 |          |                                                                                                                                                                                                                                                                                                                                                                                                                                                                                         |
|--------------------------------------------|----------------------------------------------------------------------------------------------------------------------------------|--------------------------------------|-----------------|----------|-----------------------------------------------------------------------------------------------------------------------------------------------------------------------------------------------------------------------------------------------------------------------------------------------------------------------------------------------------------------------------------------------------------------------------------------------------------------------------------------|
|                                            | Age (median [interquartile range])<br>‡:<br>Cases – 54 (48-60) years<br>Controls – 45 (37-53) years                              |                                      |                 |          |                                                                                                                                                                                                                                                                                                                                                                                                                                                                                         |
| Gillum <i>et al</i> , 1996 <sup>9</sup>    | n=652 cases<br>n=5033 total cohort<br>Country: USA (NHANES cohort)<br>Age (mean):<br>Cases – 66.7 years<br>Controls – 61.3 years | Transferrin saturation               | Stroke          | 12 years | Stroke RR for stated transferrin saturation versus 30-36% in Caucasian women:<br><20% - 1.80 (95% CI: 1.20-2.71, p<0.01)*<br>20-29% - 1.56 (95% CI: 1.09-2.23, p<0.05)*<br>37-44% - 1.14 (95% CI: 0.68-1.92)<br>>44% - 1.96 (95% CI: 1.15-3.36, p<0.05)*<br>Stroke RR for stated transferrin saturation versus 30-36% in Caucasian men:<br><20% - 1.25 (95% CI: 0.83-1.88)<br>20-29% - 0.99 (95% CI: 0.72-1.37)<br>37-44% - 0.86 (95% CI: 0.57-1.29)<br>>44% - 1.05 (95% CI: 0.67-1.62) |
| Kannel <i>et al</i> , 1972 <sup>10</sup>   | n=152 cases<br>n=5185 total cohort<br>Country: USA (Framingham Study)<br>Age: 45-74 years                                        | Hemoglobin                           | Stroke          | 16 years | Stroke OR hemoglobin ≥9.3mmol/L (15g/L) (men) or hemoglobin ≥8.7mmol/L (14g/L) (women) versus hemoglobin <9.3mmol/L (15g/L) (men) or hemoglobin <8.7mmol/L (14g/L) (women): 1.97 (p<0.05)*                                                                                                                                                                                                                                                                                              |
| Marniemi <i>et al</i> , 2005 <sup>11</sup> | n=70 cases<br>n=755 total cohort<br>Country: Finland<br>Age: 65-99 years                                                         | Serum iron<br>Transferrin            | Stroke          | 10 years | Stroke RR middle tertile versus lowest tertile of:<br>Serum iron – 0.47 (95% CI: 0.25-0.89, p=0.02)*<br>Transferrin – 1.20 (95% CI: 0.67-2.16)<br>Stroke RR highest tertile vs lowest tertile of:<br>Serum iron – 0.71 (95% CI: 0.40-1.27)<br>Transferrin – 1.07 (95% CI: 0.58-1.97)                                                                                                                                                                                                    |
| Shovlin <i>et al</i> , 2014 <sup>12</sup>  | n=61 cases                                                                                                                       | Hemoglobin<br>Ferritin<br>Serum iron | Ischemic stroke | 14 years | Ischemic stroke OR per unit increase in:<br>Hemoglobin (g/dl) – OR 1.00 (95% CI: 0.99-1.02, p=0.38)                                                                                                                                                                                                                                                                                                                                                                                     |

|                                                                                                                                               |                                      |                                                                                                                                                                                |
|-----------------------------------------------------------------------------------------------------------------------------------------------|--------------------------------------|--------------------------------------------------------------------------------------------------------------------------------------------------------------------------------|
| n=497 total cohort (patients with pulmonary malformations)<br>Country: UK<br>Age (mean) ‡:<br>Cases – 51.5 years<br>Total cohort – 47.0 years | Transferrin arteriovenous saturation | Ferritin (µg/L) – 1.00 (95% CI: 0.99-1.01, p=0.91)<br>Serum iron (µmol/L) - 0.96 (95% CI: 0.92-1.00, p=0.04)*<br>Transferrin saturation (%) – 0.99 (95% CI: 0.97-1.01, p=0.17) |
|-----------------------------------------------------------------------------------------------------------------------------------------------|--------------------------------------|--------------------------------------------------------------------------------------------------------------------------------------------------------------------------------|

Age is recorded as mean ± SD where available. Where not reported in the original study, median age or the age range of included subjects is reported.

\*statistically significant findings (P<0.05)

‡significant difference between mean/median age between cases and controls (P<0.05), with analyses were adjusted for age

CI: confidence interval; EPIC: European Prospective Investigation into Cancer and Nutrition; HR: hazard ratio; IDA: iron deficiency anemia; MONICA: Monitoring of trends and determinants in Cardiovascular Disease; n: number of subjects; NHANES: National Health And Nutrition Examination Survey; OR: odds ratio; RR: relative risk; SD: standard deviation; wt: wildtype.

**Supplemental Figures and Figure Legends:**

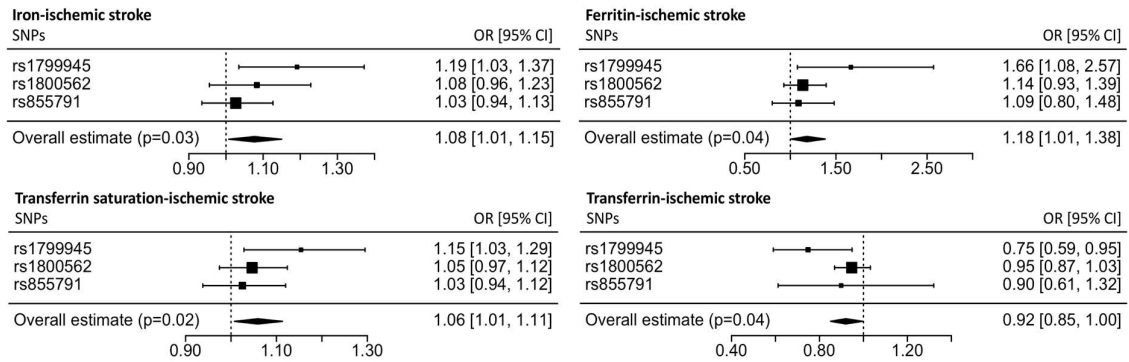

Supplemental Figure I: SNP-ischemic stroke and pooled SNP-ischemic stroke MR estimates for each of the four biomarkers of iron status represented in forest plots. The squares represent the individual SNP MR estimate, with their size proportional to the precision of the estimate, and the 95% CIs represented by the horizontal lines. The diamonds represent the pooled SNP MR estimate, with the width indicating the 95% CIs. CI: confidence interval; MR: Mendelian randomization; OR: odds ratio; SNP: single nucleotide polymorphism.

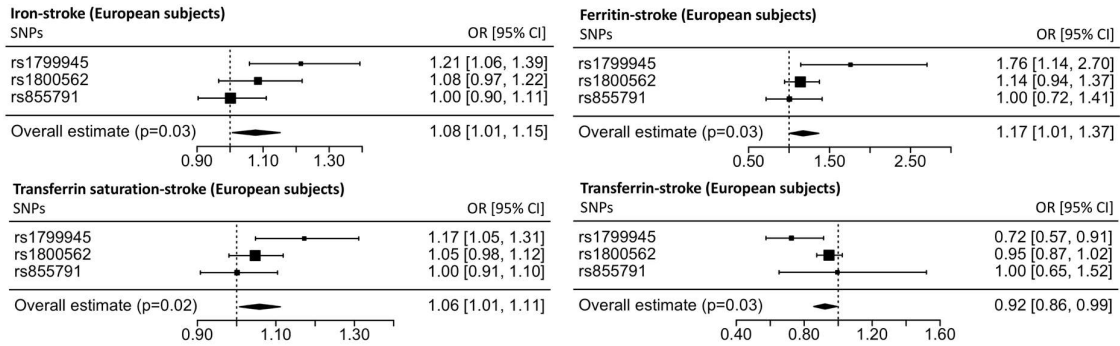

Supplemental Figure II: SNP-stroke and pooled SNP-stroke MR estimates for European subjects for each of the four biomarkers of iron status represented in forest plots. The squares represent the individual SNP MR estimate, with their size proportional to the precision of the estimate, and the 95% CIs represented by the horizontal lines. The diamonds represent the pooled SNP MR estimate, with the width indicating the 95% CIs. CI: confidence interval; MR: Mendelian randomization; OR: odds ratio; SNP: single nucleotide polymorphism.



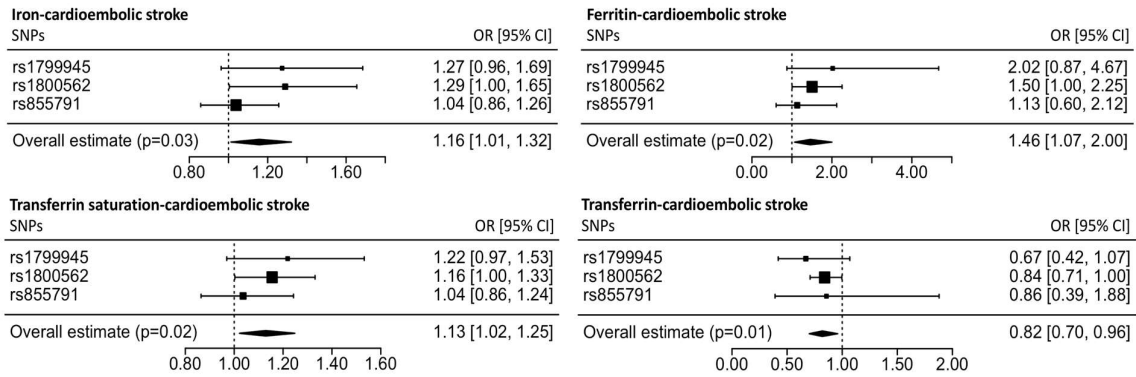

Supplemental Figure III: SNP-cardioembolic stroke and pooled SNP-cardioembolic stroke MR estimates for each of the four biomarkers of iron status represented in forest plots. The squares represent the individual SNP MR estimate, with their size proportional to the precision of the estimate, and the 95% CIs represented by the horizontal lines. The diamonds represent the pooled SNP MR estimate, with the width indicating the 95% CIs. CI: confidence interval; MR: Mendelian randomization; OR: odds ratio; SNP: single nucleotide polymorphism.

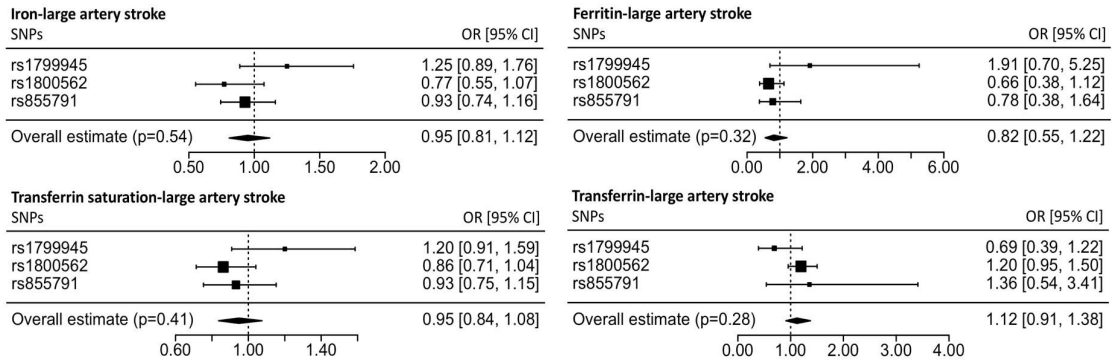

Supplemental Figure IV: SNP-large artery stroke and pooled SNP-large artery stroke MR estimates for each of the four biomarkers of iron status represented in forest plots. The squares represent the individual SNP MR estimate, with their size proportional to the precision of the estimate, and the 95% CIs represented by the horizontal lines. The diamonds represent the pooled SNP MR estimate, with the width indicating the 95% CIs. CI: confidence interval; MR: Mendelian randomization; OR: odds ratio; SNP: single nucleotide polymorphism.

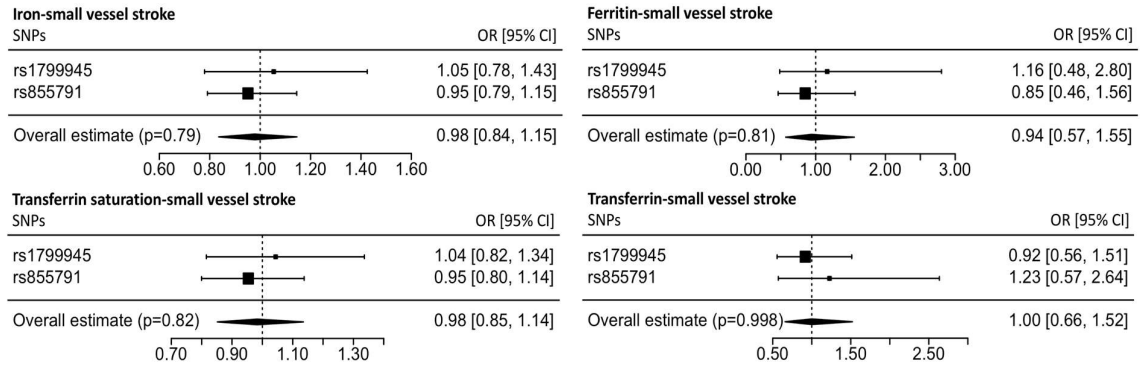

Supplemental Figure V: SNP-small vessel stroke and pooled SNP- small vessel stroke MR estimates for each of the four biomarkers of iron status represented in forest plots. The squares represent the individual SNP MR estimate, with their size proportional to the precision of the estimate, and the 95% CIs represented by the horizontal lines. The diamonds represent the pooled SNP MR estimate, with the width indicating the 95% CIs. CI: confidence interval; MR: Mendelian randomization; OR: odds ratio; SNP: single nucleotide polymorphism.

## **Supplemental References**

1. Benyamin B, Esko T, Ried JS, Radhakrishnan A, Vermeulen SH, Traglia M, et al. Novel loci affecting iron homeostasis and their effects in individuals at risk for hemochromatosis. *Nat Commun.* 2014;5:4926
2. Chang YL, Hung SH, Ling W, Lin HC, Li HC, Chung SD. Association between ischemic stroke and iron-deficiency anemia: A population-based study. *PLoS One.* 2013;8:e82952
3. Ekblom K, Hultdin J, Stegmayr B, Johansson I, Van Guelpen B, Hallmans G, et al. Iron stores and hfe genotypes are not related to increased risk of ischemic stroke. A prospective nested case-referent study. *Cerebrovasc Dis.* 2007;24:405-411
4. Hruskovicová H, Milanez T, Kobal J, Potisk KP, Petrovic D, Peterlin B. Hemochromatosis-causing mutations c282y and h63d are not risk factors for atherothrombotic cerebral infarction. *Med Sci Monit.* 2005;11:BR248-252
5. Njajou OT, Hollander M, Koudstaal PJ, Hofman A, Witteman JC, Breteler MM, et al. Mutations in the hemochromatosis gene (hfe) and stroke. *Stroke.* 2002;33:2363-2366
6. Quintana Pacheco DA, Sookthai D, Wittenbecher C, Graf ME, Schübel R, Johnson T, et al. Red meat consumption and risk of cardiovascular diseases-is increased iron load a possible link? *Am J Clin Nutr.* 2018;107:113-119
7. van der A DL, Grobbee DE, Roest M, Marx JJ, Voorbij HA, van der Schouw YT. Serum ferritin is a risk factor for stroke in postmenopausal women. *Stroke.* 2005;36:1637-1641
8. Ellervik C, Tybjaerg-Hansen A, Appleyard M, Sillesen H, Boysen G, Nordestgaard BG. Hereditary hemochromatosis genotypes and risk of ischemic stroke. *Neurology.* 2007;68:1025-1031
9. Gillum RF, Sempos CT, Makuc DM, Looker AC, Chien CY, Ingram DD. Serum transferrin saturation, stroke incidence, and mortality in women and men. The nhanes i epidemiologic followup study. National health and nutrition examination survey. *Am J Epidemiol.* 1996;144:59-68
10. Kannel WB, Gordon T, Wolf PA, McNamara P. Hemoglobin and the risk of cerebral infarction: The framingham study. *Stroke.* 1972;3:409-420
11. Marniemi J, Alanen E, Impivaara O, Seppänen R, Hakala P, Rajala T, et al. Dietary and serum vitamins and minerals as predictors of myocardial infarction and stroke in elderly subjects. *Nutr Metab Cardiovasc Dis.* 2005;15:188-197
12. Shovlin CL, Chamali B, Santhirapala V, Livesey JA, Angus G, Manning R, et al. Ischaemic strokes in patients with pulmonary arteriovenous malformations and hereditary hemorrhagic telangiectasia: Associations with iron deficiency and platelets. *PLoS One.* 2014;9:e88812
13. Malik R, Chauhan G, Traylor M, Sargurupremraj M, Okada Y, Mishra A, et al. Multiancestry genome-wide association study of 520,000 subjects identifies 32 loci associated with stroke and stroke subtypes. *Nat Genet.* 2018;50:524-537

## MEGASTROKE Authors

The full author list of the MEGASTROKE Consortium<sup>13</sup> is as follows:

Rainer Malik<sup>1</sup>, Ganesh Chauhan<sup>2</sup>, Matthew Traylor<sup>3</sup>, Muralidharan Sargurupremraj<sup>4,5</sup>, Yukinori Okada<sup>6,7,8</sup>, Aniket Mishra<sup>4,5</sup>, Loes Rutten-Jacobs<sup>3</sup>, Anne-Katrin Giese<sup>9</sup>, Sander W van der Laan<sup>10</sup>, Solveig Gretarsdottir<sup>11</sup>, Christopher D Anderson<sup>12,13,14,14</sup>, Michael Chong<sup>15</sup>, Hieab HH Adams<sup>16,17</sup>, Tetsuro Ago<sup>18</sup>, Peter Almgren<sup>19</sup>, Philippe Amouyel<sup>20,21</sup>, Hakan Ay<sup>22,13</sup>, Traci M Bartz<sup>23</sup>, Oscar R Benavente<sup>24</sup>, Steve Bevan<sup>25</sup>, Giorgio B Boncoraglio<sup>26</sup>, Robert D Brown, Jr.<sup>27</sup>, Adam S Butterworth<sup>28,29</sup>, Caty Carrera<sup>30,31</sup>, Cara L Carty<sup>32,33</sup>, Daniel I Chasman<sup>34,35</sup>, Wei-Min Chen<sup>36</sup>, John W Cole<sup>37</sup>, Adolfo Correa<sup>38</sup>, Ioana Cotlarciuc<sup>39</sup>, Carlos Cruchaga<sup>40,41</sup>, John Danesh<sup>28,42,43,44</sup>, Paul IW de Bakker<sup>45,46</sup>, Anita L DeStefano<sup>47,48</sup>, Marcel den Hoed<sup>49</sup>, Qing Duan<sup>50</sup>, Stefan T Engelter<sup>51,52</sup>, Guido J Falcone<sup>53,54</sup>, Rebecca F Gottesman<sup>55</sup>, Raji P Grewal<sup>56</sup>, Vilmundur Gudnason<sup>57,58</sup>, Stefan Gustafsson<sup>59</sup>, Jeffrey Haessler<sup>60</sup>, Tamara B Harris<sup>61</sup>, Ahamad Hassan<sup>62</sup>, Aki S Havulinna<sup>63,64</sup>, Susan R Heckbert<sup>65</sup>, Elizabeth G Holliday<sup>66,67</sup>, George Howard<sup>68</sup>, Fang-Chi Hsu<sup>69</sup>, Hyacinth I Hyacinth<sup>70</sup>, M Arfan Ikram<sup>16</sup>, Erik Ingelsson<sup>71,72</sup>, Marguerite R Irvin<sup>73</sup>, Xueqiu Jian<sup>74</sup>, Jordi Jiménez-Conde<sup>75</sup>, Julie A Johnson<sup>76,77</sup>, J Wouter Jukema<sup>78</sup>, Masahiro Kanai<sup>6,7,79</sup>, Keith L Keene<sup>80,81</sup>, Brett M Kissela<sup>82</sup>, Dawn O Kleindorfer<sup>82</sup>, Charles Kooperberg<sup>60</sup>, Michiaki Kubo<sup>83</sup>, Leslie A Lange<sup>84</sup>, Carl D Langefeld<sup>85</sup>, Claudia Langenberg<sup>86</sup>, Lenore J Launer<sup>87</sup>, Jin-Moo Lee<sup>88</sup>, Robin Lemmens<sup>89,90</sup>, Didier Leys<sup>91</sup>, Cathryn M Lewis<sup>92,93</sup>, Wei-Yu Lin<sup>28,94</sup>, Arne G Lindgren<sup>95,96</sup>, Erik Lorentzen<sup>97</sup>, Patrik K Magnusson<sup>98</sup>, Jane Maguire<sup>99</sup>, Ani Manichaikul<sup>36</sup>, Patrick F McArdle<sup>100</sup>, James F Meschia<sup>101</sup>, Braxton D Mitchell<sup>100,102</sup>, Thomas H Mosley<sup>103,104</sup>, Michael A Nalls<sup>105,106</sup>, Toshiharu Ninomiya<sup>107</sup>, Martin J O'Donnell<sup>15,108</sup>, Bruce M Psaty<sup>109,110,111,112</sup>, Sara L Pulit<sup>113,45</sup>, Kristiina Rannikmäe<sup>114,115</sup>, Alexander P Reiner<sup>65,116</sup>, Kathryn M Rexrode<sup>117</sup>, Kenneth Rice<sup>118</sup>, Stephen S Rich<sup>36</sup>, Paul M Ridker<sup>34,35</sup>, Natalia S Rost<sup>9,13</sup>, Peter M Rothwell<sup>119</sup>, Jerome I Rotter<sup>120,121</sup>, Tatjana Rundek<sup>122</sup>, Ralph L Sacco<sup>122</sup>, Saori Sakaue<sup>7,123</sup>, Michele M Sale<sup>124</sup>, Veikko Salomaa<sup>63</sup>, Bishwa R Sapkota<sup>125</sup>, Reinhold Schmidt<sup>126</sup>, Carsten O Schmidt<sup>127</sup>, Ulf Schminke<sup>128</sup>, Pankaj Sharma<sup>39</sup>, Agnieszka Slowik<sup>129</sup>, Cathie LM Sudlow<sup>114,115</sup>, Christian Tanislav<sup>130</sup>, Turgut Tatlisumak<sup>131,132</sup>, Kent D Taylor<sup>120,121</sup>, Vincent NS Thijs<sup>133,134</sup>, Gudmar Thorleifsson<sup>11</sup>, Unnur Thorsteinsdottir<sup>11</sup>, Steffen Tiedt<sup>1</sup>, Stella Trompet<sup>135</sup>, Christophe Tzourio<sup>5,136,137</sup>, Cornelia M van Duijn<sup>138,139</sup>, Matthew Walters<sup>140</sup>, Nicholas J Wareham<sup>86</sup>, Sylvia Wassertheil-Smoller<sup>141</sup>, James G Wilson<sup>142</sup>, Kerri L Wiggins<sup>109</sup>, Qiong Yang<sup>47</sup>, Salim Yusuf<sup>15</sup>, Najaf Amin<sup>16</sup>, Hugo S Aparicio<sup>185,48</sup>, Donna K Arnett<sup>186</sup>, John Attia<sup>187</sup>, Alexa S Beiser<sup>47,48</sup>, Claudine Berr<sup>188</sup>, Julie E Buring<sup>34,35</sup>, Mariana Bustamante<sup>189</sup>, Valeria Caso<sup>190</sup>, Yu-Ching Cheng<sup>191</sup>, Seung Hoan Choi<sup>192,48</sup>, Ayesha Chowhan<sup>185,48</sup>, Natalia Cullell<sup>31</sup>, Jean-François Dartigues<sup>193,194</sup>, Hossein Delavaran<sup>95,96</sup>, Pilar Delgado<sup>195</sup>, Marcus Dörr<sup>196,197</sup>, Gunnar Engström<sup>19</sup>, Ian Ford<sup>198</sup>, Wander S Gurpreet<sup>199</sup>, Anders Hamsten<sup>200,201</sup>, Laura Heitsch<sup>202</sup>, Atsushi Hozawa<sup>203</sup>, Laura Ibanez<sup>204</sup>, Andreea Ilinca<sup>95,96</sup>, Martin Ingelsson<sup>205</sup>, Motoki Iwasaki<sup>206</sup>, Rebecca D Jackson<sup>207</sup>, Katarina Jood<sup>208</sup>, Pekka Jousilahti<sup>63</sup>, Sara Kaffashian<sup>4,5</sup>, Lalit Kalra<sup>209</sup>, Masahiro Kamouchi<sup>210</sup>, Takanari Kitazono<sup>211</sup>, Olafur Kjartansson<sup>212</sup>, Manja Kloss<sup>213</sup>, Peter J Koudstaal<sup>214</sup>, Jerzy Krupinski<sup>215</sup>, Daniel L Labovitz<sup>216</sup>, Cathy C Laurie<sup>118</sup>, Christopher R Levi<sup>217</sup>, Linxin Li<sup>218</sup>, Lars Lind<sup>219</sup>, Cecilia M Lindgren<sup>220,221</sup>, Vasileios Lioutas<sup>222,48</sup>, Yong Mei Liu<sup>223</sup>, Oscar L Lopez<sup>224</sup>, Hirata

Makoto <sup>225</sup>, Nicolas Martinez-Majander <sup>172</sup>, Koichi Matsuda <sup>225</sup>, Naoko Minegishi <sup>203</sup>, Joan Montaner <sup>226</sup>, Andrew P Morris <sup>227,228</sup>, Elena Muiño <sup>31</sup>, Martina Müller-Nurasyid <sup>229,230,231</sup>, Bo Norrving <sup>95,96</sup>, Soichi Ogishima <sup>203</sup>, Eugenio A Parati <sup>232</sup>, Leema Reddy Peddareddygar <sup>56</sup>, Nancy L Pedersen <sup>98,233</sup>, Joanna Pera <sup>129</sup>, Markus Perola <sup>63,234</sup>, Alessandro Pezzini <sup>235</sup>, Silvana Pileggi <sup>236</sup>, Raquel Rabionet <sup>237</sup>, Iolanda Riba-Llena <sup>30</sup>, Marta Ribasés <sup>238</sup>, Jose R Romero <sup>185,48</sup>, Jaime Roquer <sup>239,240</sup>, Anthony G Rudd <sup>241,242</sup>, Antti-Pekka Sarin <sup>243,244</sup>, Ralhan Sarju <sup>199</sup>, Chloe Sarnowski <sup>47,48</sup>, Makoto Sasaki <sup>245</sup>, Claudia L Satizabal <sup>185,48</sup>, Mamoru Satoh <sup>245</sup>, Naveed Sattar <sup>246</sup>, Norie Sawada <sup>206</sup>, Gerli Sibolt <sup>172</sup>, Ásgeir Sigurdsson <sup>247</sup>, Albert Smith <sup>248</sup>, Kenji Sobue <sup>245</sup>, Carolina Soriano-Tárraga <sup>240</sup>, Tara Stanne <sup>249</sup>, O Colin Stine <sup>250</sup>, David J Stott <sup>251</sup>, Konstantin Strauch <sup>229,252</sup>, Takako Takai <sup>203</sup>, Hideo Tanaka <sup>253,254</sup>, Kozo Tanno <sup>245</sup>, Alexander Teumer <sup>255</sup>, Liisa Tomppo <sup>172</sup>, Nuria P Torres-Aguila <sup>31</sup>, Emmanuel Touze <sup>256,257</sup>, Shoichiro Tsugane <sup>206</sup>, Andre G Uitterlinden <sup>258</sup>, Einar M Valdimarsson <sup>259</sup>, Sven J van der Lee <sup>16</sup>, Henry Völzke <sup>255</sup>, Kenji Wakai <sup>253</sup>, David Weir <sup>260</sup>, Stephen R Williams <sup>261</sup>, Charles DA Wolfe <sup>241,242</sup>, Quenna Wong <sup>118</sup>, Huichun Xu <sup>191</sup>, Taiki Yamaji <sup>206</sup>, Dharambir K Sanghera <sup>125,169,170</sup>, Olle Melander <sup>19</sup>, Christina Jern <sup>171</sup>, Daniel Strbian <sup>172,173</sup>, Israel Fernandez-Cadenas <sup>31,30</sup>, W T Longstreth, Jr <sup>174,65</sup>, Arndt Rolfs <sup>175</sup>, Jun Hata <sup>107</sup>, Daniel Woo <sup>82</sup>, Jonathan Rosand <sup>12,13,14</sup>, Guillaume Pare <sup>15</sup>, Jemma C Hopewell <sup>176</sup>, Danish Saleheen <sup>177</sup>, Kari Stefansson <sup>11,178</sup>, Bradford B Worrall <sup>179</sup>, Steven J Kittner <sup>37</sup>, Sudha Seshadri <sup>180,48</sup>, Myriam Fornage <sup>74,181</sup>, Hugh S Markus <sup>3</sup>, Joanna MM Howson <sup>28</sup>, Yoichiro Kamatani <sup>6,182</sup>, Stephanie Debette <sup>4,5</sup>, Martin Dichgans <sup>1,183,184</sup>

1 Institute for Stroke and Dementia Research (ISD), University Hospital, LMU Munich, Munich, Germany

2 Centre for Brain Research, Indian Institute of Science, Bangalore, India

3 Stroke Research Group, Division of Clinical Neurosciences, University of Cambridge, UK

4 INSERM U1219 Bordeaux Population Health Research Center, Bordeaux, France

5 University of Bordeaux, Bordeaux, France

6 Laboratory for Statistical Analysis, RIKEN Center for Integrative Medical Sciences, Yokohama, Japan

7 Department of Statistical Genetics, Osaka University Graduate School of Medicine, Osaka, Japan

8 Laboratory of Statistical Immunology, Immunology Frontier Research Center (WPI-IFReC), Osaka University, Suita, Japan.

9 Department of Neurology, Massachusetts General Hospital, Harvard Medical School, Boston, MA, USA

10 Laboratory of Experimental Cardiology, Division of Heart and Lungs, University Medical Center Utrecht, University of Utrecht, Utrecht, Netherlands

11 deCODE genetics/AMGEN inc, Reykjavik, Iceland

12 Center for Genomic Medicine, Massachusetts General Hospital (MGH), Boston, MA, USA

13 J. Philip Kistler Stroke Research Center, Department of Neurology, MGH, Boston, MA, USA

14 Program in Medical and Population Genetics, Broad Institute, Cambridge, MA, USA

15 Population Health Research Institute, McMaster University, Hamilton, Canada

16 Department of Epidemiology, Erasmus University Medical Center, Rotterdam, Netherlands

17 Department of Radiology and Nuclear Medicine, Erasmus University Medical Center, Rotterdam, Netherlands

18 Department of Medicine and Clinical Science, Graduate School of Medical Sciences, Kyushu University, Fukuoka, Japan

19 Department of Clinical Sciences, Lund University, Malmö, Sweden

20 Univ. Lille, Inserm, Institut Pasteur de Lille, LabEx DISTALZ-UMR1167, Risk factors and molecular determinants of aging-related diseases, F-59000 Lille, France

21 Centre Hosp. Univ Lille, Epidemiology and Public Health Department, F-59000 Lille, France

22 AA Martinos Center for Biomedical Imaging, Department of Radiology, Massachusetts General Hospital, Harvard Medical School, Boston, MA, USA

23 Cardiovascular Health Research Unit, Departments of Biostatistics and Medicine, University of Washington, Seattle, WA, USA

24 Division of Neurology, Faculty of Medicine, Brain Research Center, University of British Columbia, Vancouver, Canada

25 School of Life Science, University of Lincoln, Lincoln, UK

26 Department of Cerebrovascular Diseases, Fondazione IRCCS Istituto Neurologico "Carlo Besta", Milano, Italy

27 Department of Neurology, Mayo Clinic Rochester, Rochester, MN, USA

28 MRC/BHF Cardiovascular Epidemiology Unit, Department of Public Health and Primary Care, University of Cambridge, Cambridge, UK

29 The National Institute for Health Research Blood and Transplant Research Unit in Donor Health and Genomics, University of Cambridge, UK

30 Neurovascular Research Laboratory, Vall d'Hebron Institut of Research, Neurology and Medicine Departments-Universitat Autònoma de Barcelona, Vall d'Hebrón Hospital, Barcelona, Spain

31 Stroke Pharmacogenomics and Genetics, Fundacio Docència i Recerca MutuaTerrassa, Terrassa, Spain

32 Children's Research Institute, Children's National Medical Center, Washington, DC, USA

33 Center for Translational Science, George Washington University, Washington, DC, USA

34 Division of Preventive Medicine, Brigham and Women's Hospital, Boston, MA, USA

35 Harvard Medical School, Boston, MA, USA

36 Center for Public Health Genomics, Department of Public Health Sciences, University of Virginia, Charlottesville, VA, USA

37 Department of Neurology, University of Maryland School of Medicine and Baltimore VAMC, Baltimore, MD, USA

38 Departments of Medicine, Pediatrics and Population Health Science, University of Mississippi Medical Center, Jackson, MS, USA

39 Institute of Cardiovascular Research, Royal Holloway University of London, UK & Ashford and St Peters Hospital, Surrey UK

40 Department of Psychiatry, The Hope Center Program on Protein Aggregation and Neurodegeneration (HPAN), Washington University, School of Medicine, St. Louis, MO, USA

41 Department of Developmental Biology, Washington University School of Medicine, St. Louis, MO, USA

42 NIHR Blood and Transplant Research Unit in Donor Health and Genomics, Department of Public Health and Primary Care, University of Cambridge, Cambridge, UK

43 Wellcome Trust Sanger Institute, Wellcome Trust Genome Campus, Hinxton, Cambridge, UK

44 British Heart Foundation, Cambridge Centre of Excellence, Department of Medicine, University of Cambridge, Cambridge, UK

45 Department of Medical Genetics, University Medical Center Utrecht, Utrecht, Netherlands

46 Department of Epidemiology, Julius Center for Health Sciences and Primary Care, University Medical Center Utrecht, Utrecht, Netherlands

47 Boston University School of Public Health, Boston, MA, USA

48 Framingham Heart Study, Framingham, MA, USA

49 Department of Immunology, Genetics and Pathology and Science for Life Laboratory, Uppsala University, Uppsala, Sweden

50 Department of Genetics, University of North Carolina, Chapel Hill, NC, USA

51 Department of Neurology and Stroke Center, Basel University Hospital, Switzerland

52 Neurorehabilitation Unit, University and University Center for Medicine of Aging and Rehabilitation Basel, Felix Platter Hospital, Basel, Switzerland

53 Department of Neurology, Yale University School of Medicine, New Haven, CT, USA

54 Program in Medical and Population Genetics, The Broad Institute of Harvard and MIT, Cambridge, MA, USA

55 Department of Neurology, Johns Hopkins University School of Medicine, Baltimore, MD, USA

56 Neuroscience Institute, SF Medical Center, Trenton, NJ, USA

57 Icelandic Heart Association Research Institute, Kopavogur, Iceland

58 University of Iceland, Faculty of Medicine, Reykjavik, Iceland

59 Department of Medical Sciences, Molecular Epidemiology and Science for Life Laboratory, Uppsala University, Uppsala, Sweden

60 Division of Public Health Sciences, Fred Hutchinson Cancer Research Center, Seattle, WA, USA

61 Laboratory of Epidemiology and Population Science, National Institute on Aging, National Institutes of Health, Bethesda, MD, USA

62 Department of Neurology, Leeds General Infirmary, Leeds Teaching Hospitals NHS Trust, Leeds, UK

63 National Institute for Health and Welfare, Helsinki, Finland

64 FIMM - Institute for Molecular Medicine Finland, Helsinki, Finland

65 Department of Epidemiology, University of Washington, Seattle, WA, USA

66 Public Health Stream, Hunter Medical Research Institute, New Lambton, Australia

67 Faculty of Health and Medicine, University of Newcastle, Newcastle, Australia

68 School of Public Health, University of Alabama at Birmingham, Birmingham, AL, USA

69 Department of Biostatistical Sciences, Wake Forest School of Medicine, Winston-Salem, NC, USA

70 Aflac Cancer and Blood Disorder Center, Department of Pediatrics, Emory University School of Medicine, Atlanta, GA, USA



71 Department of Medicine, Division of Cardiovascular Medicine, Stanford University School of Medicine, CA, USA

72 Department of Medical Sciences, Molecular Epidemiology and Science for Life Laboratory, Uppsala University, Uppsala, Sweden

73 Epidemiology, School of Public Health, University of Alabama at Birmingham, USA

74 Brown Foundation Institute of Molecular Medicine, University of Texas Health Science Center at Houston, Houston, TX, USA

75 Neurovascular Research Group (NEUVAS), Neurology Department, Institut Hospital del Mar d'Investigació Mèdica, Universitat Autònoma de Barcelona, Barcelona, Spain

76 Department of Pharmacotherapy and Translational Research and Center for Pharmacogenomics, University of Florida, College of Pharmacy, Gainesville, FL, USA

77 Division of Cardiovascular Medicine, College of Medicine, University of Florida, Gainesville, FL, USA

78 Department of Cardiology, Leiden University Medical Center, Leiden, the Netherlands

79 Program in Bioinformatics and Integrative Genomics, Harvard Medical School, Boston, MA, USA

80 Department of Biology, East Carolina University, Greenville, NC, USA

81 Center for Health Disparities, East Carolina University, Greenville, NC, USA

82 University of Cincinnati College of Medicine, Cincinnati, OH, USA

83 RIKEN Center for Integrative Medical Sciences, Yokohama, Japan

84 Department of Medicine, University of Colorado Denver, Anschutz Medical Campus, Aurora, CO, USA

85 Center for Public Health Genomics and Department of Biostatistical Sciences, Wake Forest School of Medicine, Winston-Salem, NC, USA

86 MRC Epidemiology Unit, University of Cambridge School of Clinical Medicine, Institute of Metabolic Science, Cambridge Biomedical Campus, Cambridge, UK

87 Intramural Research Program, National Institute on Aging, National Institutes of Health, Bethesda, MD, USA

88 Department of Neurology, Radiology, and Biomedical Engineering, Washington University School of Medicine, St. Louis, MO, USA

89 KU Leuven – University of Leuven, Department of Neurosciences, Experimental Neurology, Leuven, Belgium

90 VIB Center for Brain & Disease Research, University Hospitals Leuven, Department of Neurology, Leuven, Belgium

91 Univ.-Lille, INSERM U 1171. CHU Lille. Lille, France

92 Department of Medical and Molecular Genetics, King's College London, London, UK

93 SGDP Centre, Institute of Psychiatry, Psychology & Neuroscience, King's College London, London, UK

94 Northern Institute for Cancer Research, Paul O'Gorman Building, Newcastle University, Newcastle, UK

95 Department of Clinical Sciences Lund, Neurology, Lund University, Lund, Sweden

96 Department of Neurology and Rehabilitation Medicine, Skåne University Hospital, Lund, Sweden

97 Bioinformatics Core Facility, University of Gothenburg, Gothenburg, Sweden

98 Department of Medical Epidemiology and Biostatistics, Karolinska Institutet, Stockholm, Sweden

99 University of Technology Sydney, Faculty of Health, Ultimo, Australia

100 Department of Medicine, University of Maryland School of Medicine, MD, USA

101 Department of Neurology, Mayo Clinic, Jacksonville, FL, USA

102 Geriatrics Research and Education Clinical Center, Baltimore Veterans Administration Medical Center, Baltimore, MD, USA

103 Division of Geriatrics, School of Medicine, University of Mississippi Medical Center, Jackson, MS, USA

104 Memory Impairment and Neurodegenerative Dementia Center, University of Mississippi Medical Center, Jackson, MS, USA

105 Laboratory of Neurogenetics, National Institute on Aging, National Institutes of Health, Bethesda, MD, USA

106 Data Tecnica International, Glen Echo MD, USA

107 Department of Epidemiology and Public Health, Graduate School of Medical Sciences, Kyushu University, Fukuoka, Japan

108 Clinical Research Facility, Department of Medicine, NUI Galway, Galway, Ireland

109 Cardiovascular Health Research Unit, Department of Medicine, University of Washington, Seattle, WA, USA

110 Department of Epidemiology, University of Washington, Seattle, WA

111 Department of Health Services, University of Washington, Seattle, WA, USA

112 Kaiser Permanente Washington Health Research Institute, Seattle, WA, USA

113 Brain Center Rudolf Magnus, Department of Neurology, University Medical Center Utrecht, Utrecht, The Netherlands

114 Usher Institute of Population Health Sciences and Informatics, University of Edinburgh, Edinburgh, UK

115 Centre for Clinical Brain Sciences, University of Edinburgh, Edinburgh, UK

116 Fred Hutchinson Cancer Research Center, University of Washington, Seattle, WA, USA

117 Department of Medicine, Brigham and Women's Hospital, Boston, MA, USA

118 Department of Biostatistics, University of Washington, Seattle, WA, USA

119 Nuffield Department of Clinical Neurosciences, University of Oxford, UK

120 Institute for Translational Genomics and Population Sciences, Los Angeles Biomedical Research Institute at Harbor-UCLA Medical Center, Torrance, CA, USA

121 Division of Genomic Outcomes, Department of Pediatrics, Harbor-UCLA Medical Center, Torrance, CA, USA

122 Department of Neurology, Miller School of Medicine, University of Miami, Miami, FL, USA

123 Department of Allergy and Rheumatology, Graduate School of Medicine, the University of Tokyo, Tokyo, Japan

124 Center for Public Health Genomics, University of Virginia, Charlottesville, VA, USA

125 Department of Pediatrics, College of Medicine, University of Oklahoma Health Sciences Center, Oklahoma City, OK, USA

126 Department of Neurology, Medical University of Graz, Graz, Austria

127 University Medicine Greifswald, Institute for Community Medicine, SHIP-KEF, Greifswald, Germany

128 University Medicine Greifswald, Department of Neurology, Greifswald, Germany

129 Department of Neurology, Jagiellonian University, Krakow, Poland

130 Department of Neurology, Justus Liebig University, Giessen, Germany

131 Department of Clinical Neurosciences/Neurology, Institute of Neuroscience and Physiology, Sahlgrenska Academy at University of Gothenburg, Gothenburg, Sweden

132 Sahlgrenska University Hospital, Gothenburg, Sweden

133 Stroke Division, Florey Institute of Neuroscience and Mental Health, University of Melbourne, Heidelberg, Australia

134 Austin Health, Department of Neurology, Heidelberg, Australia

135 Department of Internal Medicine, Section Gerontology and Geriatrics, Leiden University Medical Center, Leiden, the Netherlands

136 INSERM U1219, Bordeaux, France

137 Department of Public Health, Bordeaux University Hospital, Bordeaux, France

138 Genetic Epidemiology Unit, Department of Epidemiology, Erasmus University Medical Center Rotterdam, Netherlands

139 Center for Medical Systems Biology, Leiden, Netherlands

140 School of Medicine, Dentistry and Nursing at the University of Glasgow, Glasgow, UK

141 Department of Epidemiology and Population Health, Albert Einstein College of Medicine, NY, USA

142 Department of Physiology and Biophysics, University of Mississippi Medical Center, Jackson, MS, USA

143 A full list of members and affiliations appears in the Supplementary Note

144 Department of Human Genetics, McGill University, Montreal, Canada

145 Department of Pathophysiology, Institute of Biomedicine and Translation Medicine, University of Tartu, Tartu, Estonia

146 Department of Cardiac Surgery, Tartu University Hospital, Tartu, Estonia

147 Clinical Gene Networks AB, Stockholm, Sweden

148 Department of Genetics and Genomic Sciences, The Icahn Institute for Genomics and Multiscale Biology Icahn School of Medicine at Mount Sinai, New York, NY, USA

149 Department of Pathophysiology, Institute of Biomedicine and Translation Medicine, University of Tartu, Biomeedikum, Tartu, Estonia

150 Integrated Cardio Metabolic Centre, Department of Medicine, Karolinska Institutet, Karolinska Universitetssjukhuset, Huddinge, Sweden.

151 Clinical Gene Networks AB, Stockholm, Sweden

152 Sorbonne Universités, UPMC Univ. Paris 06, INSERM, UMR\_S 1166, Team Genomics & Pathophysiology of Cardiovascular Diseases, Paris, France

153 ICAN Institute for Cardiometabolism and Nutrition, Paris, France

154 Department of Biomedical Engineering, University of Virginia, Charlottesville, VA, USA

155 Group Health Research Institute, Group Health Cooperative, Seattle, WA, USA

156 Seattle Epidemiologic Research and Information Center, VA Office of Research and Development, Seattle, WA, USA

157 Cardiovascular Research Center, Massachusetts General Hospital, Boston, MA, USA

158 Department of Medical Research, Bærum Hospital, Vestre Viken Hospital Trust, Gjøttum, Norway

159 Saw Swee Hock School of Public Health, National University of Singapore and National University Health System, Singapore

160 National Heart and Lung Institute, Imperial College London, London, UK

161 Department of Gene Diagnostics and Therapeutics, Research Institute, National Center for Global Health and Medicine, Tokyo, Japan

162 Department of Epidemiology, Tulane University School of Public Health and Tropical Medicine, New Orleans, LA, USA

163 Department of Cardiology, University Medical Center Groningen, University of Groningen, Netherlands

164 MRC-PHE Centre for Environment and Health, School of Public Health, Department of Epidemiology and Biostatistics, Imperial College London, London, UK

165 Department of Epidemiology and Biostatistics, Imperial College London, London, UK

166 Department of Cardiology, Ealing Hospital NHS Trust, Southall, UK

167 National Heart, Lung and Blood Research Institute, Division of Intramural Research, Population Sciences Branch, Framingham, MA, USA

168 A full list of members and affiliations appears at the end of the manuscript

169 Department of Pharmaceutical Sciences, College of Pharmacy, University of Oklahoma Health Sciences Center, Oklahoma City, OK, USA

170 Oklahoma Center for Neuroscience, Oklahoma City, OK, USA

171 Department of Pathology and Genetics, Institute of Biomedicine, The Sahlgrenska Academy at University of Gothenburg, Gothenburg, Sweden

172 Department of Neurology, Helsinki University Hospital, Helsinki, Finland

173 Clinical Neurosciences, Neurology, University of Helsinki, Helsinki, Finland

174 Department of Neurology, University of Washington, Seattle, WA, USA

175 Albrecht Kossel Institute, University Clinic of Rostock, Rostock, Germany

176 Clinical Trial Service Unit and Epidemiological Studies Unit, Nuffield Department of Population Health, University of Oxford, Oxford, UK

177 Department of Genetics, Perelman School of Medicine, University of Pennsylvania, PA, USA

178 Faculty of Medicine, University of Iceland, Reykjavik, Iceland

179 Departments of Neurology and Public Health Sciences, University of Virginia School of Medicine, Charlottesville, VA, USA

180 Department of Neurology, Boston University School of Medicine, Boston, MA, USA

181 Human Genetics Center, University of Texas Health Science Center at Houston, Houston, TX, USA

182 Center for Genomic Medicine, Kyoto University Graduate School of Medicine, Kyoto, Japan

183 Munich Cluster for Systems Neurology (SyNergy), Munich, Germany

184 German Center for Neurodegenerative Diseases (DZNE), Munich, Germany

185 Boston University School of Medicine, Boston, MA, USA

186 University of Kentucky College of Public Health, Lexington, KY, USA

187 University of Newcastle and Hunter Medical Research Institute, New Lambton, Australia

188 Univ. Montpellier, Inserm, U1061, Montpellier, France

189 Centre for Research in Environmental Epidemiology, Barcelona, Spain

190 Department of Neurology, Università degli Studi di Perugia, Umbria, Italy

191 Department of Medicine, University of Maryland School of Medicine, Baltimore, MD, USA  
192 Broad Institute, Cambridge, MA, USA  
193 Univ. Bordeaux, Inserm, Bordeaux Population Health Research Center, UMR 1219, Bordeaux, France  
194 Bordeaux University Hospital, Department of Neurology, Memory Clinic, Bordeaux, France  
195 Neurovascular Research Laboratory. Vall d'Hebron Institut of Research, Neurology and Medicine Departments-Universitat Autònoma de Barcelona. Vall d'Hebrón Hospital, Barcelona, Spain  
196 University Medicine Greifswald, Department of Internal Medicine B, Greifswald, Germany  
197 DZHK, Greifswald, Germany  
198 Robertson Center for Biostatistics, University of Glasgow, Glasgow, UK  
199 Hero DMC Heart Institute, Dayanand Medical College & Hospital, Ludhiana, India  
200 Atherosclerosis Research Unit, Department of Medicine Solna, Karolinska Institutet, Stockholm, Sweden  
201 Karolinska Institutet, Stockholm, Sweden  
202 Division of Emergency Medicine, and Department of Neurology, Washington University School of Medicine, St. Louis, MO, USA  
203 Tohoku Medical Megabank Organization, Sendai, Japan  
204 Department of Psychiatry, Washington University School of Medicine, St. Louis, MO, USA  
205 Department of Public Health and Caring Sciences / Geriatrics, Uppsala University, Uppsala, Sweden  
206 Epidemiology and Prevention Group, Center for Public Health Sciences, National Cancer Center, Tokyo, Japan  
207 Department of Internal Medicine and the Center for Clinical and Translational Science, The Ohio State University, Columbus, OH, USA  
208 Institute of Neuroscience and Physiology, the Sahlgrenska Academy at University of Gothenburg, Goteborg, Sweden  
209 Department of Basic and Clinical Neurosciences, King's College London, London, UK  
210 Department of Health Care Administration and Management, Graduate School of Medical Sciences, Kyushu University, Japan  
211 Department of Medicine and Clinical Science, Graduate School of Medical Sciences, Kyushu University, Japan  
212 Landspítali National University Hospital, Departments of Neurology & Radiology, Reykjavik, Iceland  
213 Department of Neurology, Heidelberg University Hospital, Germany  
214 Department of Neurology, Erasmus University Medical Center  
215 Hospital Universitari Mutua Terrassa, Terrassa (Barcelona), Spain  
216 Albert Einstein College of Medicine, Montefiore Medical Center, New York, NY, USA  
217 John Hunter Hospital, Hunter Medical Research Institute and University of Newcastle, Newcastle, NSW, Australia  
218 Centre for Prevention of Stroke and Dementia, Nuffield Department of Clinical Neurosciences, University of Oxford, UK  
219 Department of Medical Sciences, Uppsala University, Uppsala, Sweden

220 Genetic and Genomic Epidemiology Unit, Wellcome Trust Centre for Human Genetics, University of Oxford, Oxford, UK

221 The Wellcome Trust Centre for Human Genetics, Oxford, UK

222 Beth Israel Deaconess Medical Center, Boston, MA, USA

223 Wake Forest School of Medicine, Wake Forest, NC, USA

224 Department of Neurology, University of Pittsburgh, Pittsburgh, PA, USA

225 BioBank Japan, Laboratory of Clinical Sequencing, Department of Computational biology and medical Sciences, Graduate school of Frontier Sciences, The University of Tokyo, Tokyo, Japan

226 Neurovascular Research Laboratory, Vall d'Hebron Institut of Research, Neurology and Medicine Departments-Universitat Autònoma de Barcelona. Vall d'Hebrón Hospital, Barcelona, Spain

227 Department of Biostatistics, University of Liverpool, Liverpool, UK

228 Wellcome Trust Centre for Human Genetics, University of Oxford, Oxford, UK

229 Institute of Genetic Epidemiology, Helmholtz Zentrum München - German Research Center for Environmental Health, Neuherberg, Germany

230 Department of Medicine I, Ludwig-Maximilians-Universität, Munich, Germany

231 DZHK (German Centre for Cardiovascular Research), partner site Munich Heart Alliance, Munich, Germany

232 Department of Cerebrovascular Diseases, Fondazione IRCCS Istituto Neurologico "Carlo Besta", Milano, Italy

233 Karolinska Institutet, MEB, Stockholm, Sweden

234 University of Tartu, Estonian Genome Center, Tartu, Estonia, Tartu, Estonia

235 Department of Clinical and Experimental Sciences, Neurology Clinic, University of Brescia, Italy

236 Translational Genomics Unit, Department of Oncology, IRCCS Istituto di Ricerche Farmacologiche Mario Negri, Milano, Italy

237 Department of Genetics, Microbiology and Statistics, University of Barcelona, Barcelona, Spain

238 Psychiatric Genetics Unit, Group of Psychiatry, Mental Health and Addictions, Vall d'Hebron Research Institute (VHIR), Universitat Autònoma de Barcelona, Biomedical Network Research Centre on Mental Health (CIBERSAM), Barcelona, Spain

239 Department of Neurology, IMIM-Hospital del Mar, and Universitat Autònoma de Barcelona, Spain

240 IMIM (Hospital del Mar Medical Research Institute), Barcelona, Spain

241 National Institute for Health Research Comprehensive Biomedical Research Centre, Guy's & St. Thomas' NHS Foundation Trust and King's College London, London, UK

242 Division of Health and Social Care Research, King's College London, London, UK

243 FIMM-Institute for Molecular Medicine Finland, Helsinki, Finland

244 THL-National Institute for Health and Welfare, Helsinki, Finland

245 Iwate Tohoku Medical Megabank Organization, Iwate Medical University, Iwate, Japan

246 BHF Glasgow Cardiovascular Research Centre, Faculty of Medicine, Glasgow, UK

247 deCODE Genetics/Amgen, Inc., Reykjavik, Iceland

248 Icelandic Heart Association, Reykjavik, Iceland

249 Institute of Biomedicine, the Sahlgrenska Academy at University of Gothenburg, Goteborg, Sweden

250 Department of Epidemiology, University of Maryland School of Medicine, Baltimore, MD, USA

251 Institute of Cardiovascular and Medical Sciences, Faculty of Medicine, University of Glasgow, Glasgow, UK

252 Chair of Genetic Epidemiology, IBE, Faculty of Medicine, LMU Munich, Germany

253 Division of Epidemiology and Prevention, Aichi Cancer Center Research Institute, Nagoya, Japan

254 Department of Epidemiology, Nagoya University Graduate School of Medicine, Nagoya, Japan

255 University Medicine Greifswald, Institute for Community Medicine, SHIP-KEF, Greifswald, Germany

256 Department of Neurology, Caen University Hospital, Caen, France

257 University of Caen Normandy, Caen, France

258 Department of Internal Medicine, Erasmus University Medical Center, Rotterdam, Netherlands

259 Landspítali University Hospital, Reykjavik, Iceland

260 Survey Research Center, University of Michigan, Ann Arbor, MI, USA

261 University of Virginia Department of Neurology, Charlottesville, VA, USA
